1 **A Novel Household Water Insecurity Scale: Procedures and Psychometric**  
2 **Analysis among Postpartum Women in Western Kenya**

3 Godfred O. Boateng<sup>1</sup>, Shalean M. Collins<sup>1</sup>, Patrick Mbullo<sup>2</sup>, Pauline Wekesa<sup>3</sup>, Maricianah  
4 Onono<sup>3</sup>, Torsten B. Neilands<sup>4</sup>, Sera L. Young\*<sup>1,5</sup>

5 <sup>1</sup>Department of Anthropology, Northwestern University, Evanston, Illinois, United States of  
6 America

7 <sup>2</sup>Pamoja Community Based Organization, Kisumu, Kenya

8 <sup>3</sup>Kenya Medical Research Institute, Nairobi, Kenya

9 <sup>4</sup>Department of Medicine, Division of Prevention Science, Center for AIDS Prevention Studies,  
10 University of California, San Francisco, California, United States of America

11 <sup>5</sup>Institute for Policy Research, Northwestern University, Evanston, Illinois, United States of  
12 America

13

14 \*Corresponding author

15 Email: [sera.young@northwestern.edu](mailto:sera.young@northwestern.edu) (SLY)

16

17

18 Contributions

19 The authors' responsibilities were as follows: GOB and SLY: wrote the introduction and had  
20 primary responsibility for the final content of the manuscript; GOB: designed and performed  
21 data cleaning, analysis, wrote the methods, results, discussion, and conclusion parts of the  
22 manuscript. TBN: supervised the analysis; SLY, SC, PM, MO and PW were involved in study  
23 coordination, data collection and data management. SLY designed the study; all authors  
24 contributed to the intellectual content of the manuscript, provided critical review of the  
25 manuscript, and approved the final manuscript.

26

## 27 **Abstract**

28

29 Our ability to measure household-level food insecurity has revealed its critical role in a range of  
30 physical, psychosocial, and health outcomes. Currently, there is no analogous, standardized  
31 instrument for quantifying household-level water insecurity, which prevents us from  
32 understanding both its prevalence and consequences. Therefore, our objectives were to develop  
33 and validate a household water insecurity scale appropriate for use in our cohort in western  
34 Kenya. We used a range of qualitative techniques to develop a preliminary set of 29 household  
35 water insecurity questions, and administered those questions at 15 and 18 months postpartum,  
36 concurrent with a suite of other survey modules. These data were complemented by data on  
37 quantity of water used and stored, and microbiological quality. Inter-item and item-total  
38 correlations were performed to reduce scale items to 20. Exploratory factor and parallel analyses  
39 were used to determine the latent factor structure; a unidimensional scale was hypothesized and  
40 tested using confirmatory factor and bifactor analyses, along with multiple statistical fit indices.  
41 Reliability was assessed using Cronbach's alpha and the coefficient of stability, which produced  
42 a coefficient alpha of 0.97 at 15 and 18 months postpartum and a coefficient of stability of 0.62.  
43 Predictive, convergent and discriminant validity of the final household water insecurity scale  
44 were supported, based on relationships with food insecurity, perceived stress, per capita  
45 household water use, and time and money spent acquiring water. The resultant scale is a valid  
46 and reliable instrument. It can be used in this setting to test a range of hypotheses about the role  
47 of household water insecurity in numerous physical and psychosocial health outcomes, to  
48 identify the households most vulnerable to water insecurity, and to evaluate the effects of water-  
49 related interventions. To extend its applicability, we encourage efforts to develop a cross-  
50 culturally valid scale using robust qualitative and quantitative techniques.

## 51 **Introduction**

52 Water security, the ability to access and benefit from affordable, adequate, reliable, and  
53 safe water for wellbeing and a healthy life [1], is fundamental to physical and mental health [2–  
54 5]. There is also widespread agreement that difficulty with regular availability and access to  
55 water in sufficient quality and quantity is a serious problem [6,7] that will only increase, given  
56 climatic changes and increased water use [8,9]. While there are many plausible ways in which  
57 water insecurity can impact health, there are very few empirical data exploring the pathways by  
58 which water insecurity may be deleterious [10].

59 Understanding the impact of water insecurity is perhaps most pressing for two groups:  
60 women and people living with HIV (PLHIV) residing in places with low water security. In most  
61 parts of the developing world, women bear the physical responsibility and psychological burden  
62 of ensuring adequate household water [4,11–13]. This responsibility can be very demanding in  
63 terms of time and energy (e.g. walking long distances to water sources, carrying heavy jerry  
64 cans) and can also leave women vulnerable to physical and sexual violence *en route* to sources  
65 [14,15]. Further, water acquisition can leave women less time for other critical responsibilities  
66 (which are also often water-intensive and promote health and hygiene), such as bathing children,  
67 laundry, and preparing food [16]. The energy and time required to acquire water can also  
68 compromise women’s ability to care for their children through activities such as breastfeeding  
69 and clinic visits. It can preclude women from engaging in wage-earning activities and children  
70 from attending school [10,13]. Finally, pregnant and lactating women can have less physical  
71 ability to access water just as their needs increase, making the need for readily accessible, clean  
72 water especially vital during pregnancy and lactation [17].

73 Because water insecurity often occurs in regions of high HIV prevalence, there is a  
74 likelihood of syndemicity, the co-occurrence of intersecting, overlapping epidemics [18–20].

75 Food insecurity and HIV have similarly been considered as syndemic [21]. PLHIV are more  
76 susceptible to waterborne diseases, including diarrhea [22]. Diarrhea can in turn lead to poor  
77 intestinal absorption of essential nutrients and therapeutic dosages of medicines [23,24]. People  
78 with advanced HIV can have compromised physical ability to access water [25], and their care  
79 often requires more water to preserve hygiene [25–27]. Further, an additional 1.5 liters of clean  
80 water per day is required to metabolize some HIV medicines [26].

81         Of the 748 million people who do not have access to clean water, 325 million (43%) live  
82 in sub-Saharan Africa [11]. In Kenya, where 27% of the population obtain drinking water from  
83 an unimproved source [28], water scarcity is further exacerbated by the unequal geographic  
84 distribution of water resources [29,30] and large seasonal fluctuations in rainfall [31–33]. Within  
85 our study setting in Nyanza region, the mean rainfall during the wet season has been 180.05mm,  
86 with a range of 143 mm to 283.33 mm. A mean of 80.99 mm has been recorded for the dry  
87 season over a 10-year period (1990-2000), with a range of 18.24 to 110.46 mm [34].

88         In the course of our ongoing work on the consequences of food insecurity amongst  
89 pregnant and lactating women of mixed HIV status, formative research revealed that there were  
90 many experiences of water insecurity that were perceived to be deleterious [19,35]. For instance,  
91 formative work revealed that 77.3% of our participants felt ‘somewhat or strongly concerned’ for  
92 their physical safety during water acquisition; 64.1% reported drinking unsafe water; 65.3%  
93 reported worrying about accessing sufficient water and women without water in their compound  
94 spent an average of 4.5 (6.7) hours per week acquiring water [19]. Further, in qualitative work,  
95 women reported consequences of water insecurity including intimate partner violence, risk of  
96 miscarriage and stillbirth from carrying water, conflict with neighbors at water sources, and  
97 attacks from people and animals while fetching water [35].

98           A review of the extant literature showed a burgeoning field of household water insecurity  
99   scales developed in, e.g. Latin America [4,36], North America [37,38], South Asia [39], and sub-  
100   Saharan Africa [2,3,40]. However, these efforts to measure household water insecurity have been  
101   associated with a number of limitations including the lack of formative work, lack of robust scale  
102   validation, excessive length, and different target populations (i.e. not pregnant or post-partum)  
103   [1]. Also, the items that comprised the scale and analytic approaches used were highly variable  
104   across existing scales [1]. Furthermore, the dimensions of the existing scales were varied; while  
105   some scales showed a single dimension [2–4,36,40], others had multiple dimensions [39,41].  
106   Further, we could find no scale for measuring household water insecurity validated for Kenya.  
107   Therefore, we set out to develop and validate a household water insecurity (HHWI) scale  
108   appropriate for pregnant and post-partum Kenyan women of mixed HIV status.

## 109   **Methodology**

### 110   **Study setting and population**

111           Data for scale development and validation were collected between June 2015 and August  
112   2016 in Nyanza region, southwestern Kenya where the Luo, Kisi/Gusii, Kuria, and Luhya are the  
113   predominant ethnic groups. The major economic activities include fishing (on the nearby Lake  
114   Victoria), and mixed and agro-pastoral agriculture [42]. The region is typified by low crop yields  
115   and soil fertility, with a greater proportion of farmers engaged in subsistence farming [43].  
116   Nyanza is one of the poorest regions in Kenya, with about 63% of the population living on less  
117   than \$1 a day [44].

118 Research was conducted in the context of an observational cohort of 266 postpartum  
119 HIV-infected and HIV-uninfected women entitled “Pii en Ngima” [PEN], Luo for “water is life”  
120 (Clinicaltrials.gov# NCT02979418) who had been previously enrolled in a pregnancy cohort  
121 titled “Pith Moromo” (Clinicaltrials.gov # NCT02974972). HIV-infected women were over-  
122 sampled to achieve 1:1 ratio. The study took place in seven clinical catchment areas that span  
123 urban, peri-urban and rural sites across Nyanza region including Kisumu (urban), Migori (peri-  
124 urban), Nyahera (peri-urban), Rongo (peri-urban), Macalder (rural), Nyamaraga (rural), and  
125 Ongo (rural). Family AIDS Care and Education Services (FACES), an HIV care and treatment  
126 program in Nyanza region, supported each of the clinics in the medical sites.

127 Nyanza region was an appropriate study site because of the high level of food and water  
128 scarcity [19], the high prevalence of HIV, which is currently 6.9% for pregnant women in  
129 western Kenya [45], and the presence of an excellent clinical care, research and laboratory  
130 infrastructure through FACES.

## 131 **Data collection**

132 Data collection for this study was structured in four phases (Table 1). The first phase,  
133 formative data collection, explored the experiences of water insecurity through “go-along  
134 interviews” (Activity A) [46,47], Photovoice photo elicitation interviews (Activity B) [48,49],  
135 and the Delphi method (Activity C) [50], which was conducted concurrently with focus group  
136 discussions (FGDs; Activity D) [35]. The second phase involved the assembly (Activity E) and  
137 revision of HHWI scale questions using cognitive interviews (Activity F) [51–53]. The third  
138 phase entailed the administration of the survey to individual women (Activity G) and the final  
139 phase included collection of non-survey data for purposes of further scale validation (Activity  
140 H). Activities A, B, and D used non-cohort women (n=20) with similar demographic

141 characteristics as those used in the third phase for survey administration, Activities G and H  
 142 (n=241 and n=186, respectively).

143 **Table 1. Data collection activities for the construction and development of the household**  
 144 **water insecurity scale.**

145

| Activity                                                               | Procedures                                                                                                                                                                                                                   | Purposes                                                                    | Sample                                                                                    | Dates of activities                    |
|------------------------------------------------------------------------|------------------------------------------------------------------------------------------------------------------------------------------------------------------------------------------------------------------------------|-----------------------------------------------------------------------------|-------------------------------------------------------------------------------------------|----------------------------------------|
| <b>Phase 1: Formative data collection</b>                              |                                                                                                                                                                                                                              |                                                                             |                                                                                           |                                        |
| A. Go-along interviews of water access and use                         | Participant observation and HHWI <sup>a</sup> interview.                                                                                                                                                                     | To explore experiences of household water use, acquisition and insecurity.  | Non-cohort Kenyan women, n=20                                                             | 06/2015-09/2015                        |
| B. Photovoice (photo elicitation interviews)                           | Participants were briefly interviewed and lent digital cameras to take photographs of water related experiences. A second individual interview explored photographs and was followed by FGDs on most common emergent themes. | To explore experiences of household water use, acquisition, and insecurity. | Non-cohort Kenyan women, n=20                                                             | 07/2015-10/2015                        |
| C. The Delphi Method (S1 Fig., S1 Table) <sup>b</sup>                  | International experts on water and food insecurity were purposively selected to achieve a range of disciplines and geographic areas and asked to participate in online iterative surveys about HHWI                          | To identify and build consensus on key concepts related to HHWI             | Non-cohort international professionals<br>Round 1, n=22<br>Round 2, n=17<br>Round 3, n=12 | 06/2015-01/2016                        |
| D. Focus group discussions (FGDs) (S1 Fig)                             | After each Delphi round (Activity C), convenience sampling was used to select pregnant or postpartum field experts for FGDs in Kenya                                                                                         | To identify and build consensus on key concepts related to HHWI             | Non-cohort Kenyan women<br>Round 1, n=15<br>Round 2, n=12                                 | 09/2015-11/2015                        |
| <b>Phase 2: Assembly and Revision of HHWI Scale Questions</b>          |                                                                                                                                                                                                                              |                                                                             |                                                                                           |                                        |
| E. Assembly of scale questions                                         | Compiled initial HHWI questions based on steps A-D and existing literature.                                                                                                                                                  | To create an initial HHWI questionnaire                                     | n=29 questions                                                                            | 09/2015-11/2015                        |
| F. Cognitive interviews                                                | Questions from Activity E were asked, followed by probing questions                                                                                                                                                          | To determine if questions were understood as intended or could be improved. | Non-cohort Kenyan women, n=10                                                             | 11/2015                                |
| <b>Phase 3: Survey Administration at 15 &amp; 18 months postpartum</b> |                                                                                                                                                                                                                              |                                                                             |                                                                                           |                                        |
| G. Household Water Insecurity survey module (S2 Table) <sup>c</sup>    | Administered survey comprised of scale questions among mixed HIV status women                                                                                                                                                | Measure HHWI in women's daily lives                                         | PEN cohort participants<br>n=241 (15mpp <sup>d</sup> )<br>n=186 (18mpp)                   | 03/2016 – 09/2016<br>05/2016 – 10/2016 |
| H. Survey data for scale validation                                    | Administered survey questions about time spent collecting water, the primary source of drinking water, amount of money spent                                                                                                 | To validate HHWI scale                                                      | PEN cohort participants<br>n=241 (15mpp)<br>n=186 (18mpp)                                 | 03/2016 – 09/2016<br>05/2016 – 10/2016 |

| Activity                                                  | Procedures                                                                                                                                                                                         | Purposes                                                                    | Sample                 | Dates of activities |
|-----------------------------------------------------------|----------------------------------------------------------------------------------------------------------------------------------------------------------------------------------------------------|-----------------------------------------------------------------------------|------------------------|---------------------|
|                                                           | purchasing water, individual food insecurity, and perceived stress                                                                                                                                 |                                                                             |                        |                     |
| <b>Phase 4: Non-survey data for further validation</b>    |                                                                                                                                                                                                    |                                                                             |                        |                     |
| I. Drinking water quality                                 | Measured <i>Escherichia coli</i> concentrations using Colilert™ and Compartment Bag Test (CBT) assays                                                                                              | Measure water quality                                                       | PEN cohort women, n=35 | 01/2016             |
| J. Water quantity (stored water and amount of water used) | Measured the quantity of drinking water stored and used by the household (in liters)                                                                                                               | Measure total household drinking water stores and total household water use | PEN cohort women, n=35 | 01/2016             |
| K. Retrospective Recall                                   | Two exercises were conducted with a randomly selected subset of respondents. The first was administered daily for 30 days and the second administered retrospectively on the 31 <sup>st</sup> day. | Data collected to assess intra-respondent reliability                       | PEN cohort women, n=35 | 11/2016             |

146 Notes: <sup>a</sup>household water insecurity; <sup>b</sup>Supplementary Table 1; <sup>c</sup>Supplementary Table 2; <sup>d</sup>months  
 147 postpartum

## 148 **Phase 1: Formative data collection**

149 Although the results of our Phase 1 are presented elsewhere to avoid an excessively long  
 150 manuscript [35], we briefly describe the formative methods used in order to convey the basis of  
 151 the initial scale questions and to place our scale development activities within a broader context.

### 152 **A. Go-along interviews**

153 Go-along interviews are a hybrid between participatory research and qualitative in-depth  
 154 interviewing, that attempt to contextualize meaning within social and spatial contexts [46,47,54].  
 155 In this study, a Kenyan anthropologist (PM) accompanied participants to and from water  
 156 collection sites while asking questions. The interviews were translated (from Swahili or Luo to  
 157 English), transcribed, coded and analyzed using Dedoose software (Los Angeles, CA:  
 158 SocioCultural Research Consultants, LLC).

159



## 160 **B. Photovoice**

161 Photovoice applies documentary photography and critical dialogue to explore the lived  
162 experiences of people and as a means of sharing knowledge [48,49]. In this study, twenty women  
163 were lent digital cameras to take photos of their experiences of household water acquisition, use  
164 and insecurity. On a second visit, these photos were used to conduct in-depth individual  
165 interviews. A subset of these photos became the core focus for dialogues about HHWI during  
166 FGDs at a third encounter. Dedoose was also used to code translated transcripts from in-depth  
167 interviews and FGDs.

## 168 **C. Delphi method**

169 The Delphi method is a technique “for structuring a group communication process so that  
170 the process is effective in allowing a group of individuals, as a whole, to deal with a complex  
171 problem” [50]. Here, it was used to obtain feedback from international experts including those  
172 with expertise in hydrology and geographic research, WASH and water related programs, policy  
173 implementation, food insecurity and scale development, over the course of three rounds of  
174 surveys (**S1 Fig**). Each round was interspersed with FGDs in which questionnaires progressively  
175 became more closed ended. Questions included the definition of water insecurity, household  
176 water-related activities, barriers to water acquisition, consequences of water insecurity, and  
177 possible survey items that could constitute a HHWI scale (**S1 Table**).

## 178 **D. Focus group discussions**

179 FGDs were conducted iteratively with the Delphi process (S1 Fig.). To participate in  
180 FGDs, nurses and healthcare professionals purposively recruited postpartum women who were  
181 available and were either pregnant or had children less than 2 years of age in 4 study areas. After

182 Delphi round 1, FGD participants (Kisumu; n=8 and Rongo; n=7) were asked to provide  
183 feedback on topics discussed in the online survey to build consensus around the definition of and  
184 questions related to HHWI. Another group of FGD participants (Migori; n=5 and Macalder; n=7)  
185 also provided information with which to revise questions for the survey.

## 186 **Assembly and Revision of Scale Questions**

### 187 **E. Assembly of scale questions**

188 Based on themes that emerged from activities A-D [35], and the burgeoning literature on  
189 measurement of household water insecurity [2–4,37,36], we created 29 questions related to  
190 HHWI. Thirteen (13) of the questions (marked with asterisk in S2 Table) on the psychological,  
191 social, economic, and health consequences of water insecurity were adapted and modified from  
192 previous water insecurity scales [2,3,36,40]; the other 16 questions originated from activities A-  
193 D. The 29 questions were then ordered in what we considered to be least to most severe  
194 manifestations of water insecurity. They were phrased as Likert-type items, with the following  
195 response options: never (0), rarely (1-2 times), sometimes (3-10 times), and often (more than 10  
196 times) in the last four weeks.

### 197 **F. Cognitive interviewing**

198 Once the questions were developed, we conducted cognitive interviews (n=10). Cognitive  
199 interviewing was used to assess: whether participants perceived the intent of the water insecurity  
200 questions as intended, whether participants were able to repeat questions they had been asked  
201 and the thought processes behind their responses, and whether the response options were  
202 appropriate and/or adequate [51–53]. This interviewing approach resulted in only some minor  
203 rephrasing of the 29 items (**S2 Table**).

## 204 **HHWI Survey Administration (15 & 18 months postpartum)**

### 205 **G. HHWI scale questions**

206           The HHWI module was then administered as part of the PEN study at 15 and 18 months  
207 postpartum.

### 208 **H. Survey data for scale validation**

209           Participants were also asked other survey questions pertaining to water and their physical  
210 and psychological health for purposes of scale validation.

211           Water acquisition questions were asked to help assess convergent validity. Participants  
212 were asked to indicate how long it took for them to travel to the water source, queue, fetch water  
213 and return to their houses and how much they spent on water. Additionally, we assessed access  
214 to safe water by using the WHO/UNICEF [11] survey questions for improved and unimproved  
215 drinking water sources.

216           Food insecurity was assessed for purposes of predictive validity. We used the Individual  
217 Food Insecurity Access Scale (IFIAS) [51], which is a 9-item scale analogous to the Household  
218 Food Insecurity Access Scale (HFIAS) [55] but asks participants about their own individual  
219 experiences with access to food in the prior month. The intensity of food insecurity was assessed  
220 with follow-up questions asking whether this condition was experienced never, rarely,  
221 sometimes, or often (coded 0, 1, 2 or 3) with a range of 0-27.

222           Maternal stress was also assessed to examine predictive validity. We used Cohen's  
223 Perceived Stress Scale [56], These questions asked about the feelings and thoughts of women in  
224 the prior month, i.e. the frequency they felt upset, nervous or worried. The intensity of perceived  
225 stress was assessed by Likert-type response format of never, almost never, sometimes, fairly  
226 often and very often (coded 0, 1, 2, 3 or 4) with a range of 0-40.

## 227 **Non-survey data for further validation**

### 228 **I. Water quality**

229 Data on water quality were collected at 5 randomly selected PEN participant households  
230 in each of the 7 catchment areas (n=35). Drinking water quality was assessed by aseptically  
231 collecting triplicate 100ml water samples using Whirl-Pak Thio-Bags to test for coliform and  
232 *E.coli* MPN using Compartment Bag Tests (CBT) (Aquagenx) and Colilert (Idexx Laboratories)  
233 [57]. Samples collected were analyzed for total coliform most probable number (MPN) and  
234 *E.coli* MPN using CBT and Colilert methodologies. Water quality was dichotomized according  
235 to WHO standards showing the presence of *Escherichia coli* ( $\geq 1$  MPN/100 ml) in household  
236 drinking water [58–60].

### 237 **J. Water quantity**

238 In the same 35 households, we measured the amounts of stored water for drinking and  
239 non-drinking purposes at a single time point in a given day. The volume was measured in litres  
240 based on the size of the storage containers and the amount of water in the container. For instance,  
241 a half-full 20-litre jerry can was measured as 10 litres of stored water. We also measured the  
242 amount of water used daily by the household in litres based on estimates of the amount of water  
243 used in cooking, drinking, washing foods, washing clothes, bathing, washing face, brushing  
244 teeth, washing hands, washing utensils/dishes, and washing toilets. By dividing the total amount  
245 of water used by number of individuals in the household, we were able to estimate per capita  
246 household daily water use. For purposes of analysis, complete data were available for 27  
247 households. Of the eight households dropped, 3 had no stored drinking water and 5 had data  
248 available from a different time point.

249

## 250 **K. Retrospective recall**

251 To assess intra-respondent reliability, we administered a subset of the 29 items (20-item  
 252 version of the water insecurity module) daily for 30 days. We used 20 items to reduce  
 253 respondents' fatigue as it was being asked continuously for a month. Thirty-five participants  
 254 were asked each day if they had that experience of water insecurity in the prior day and could  
 255 respond yes or no. On the 31<sup>st</sup> day, participants were asked to indicate the number of days they  
 256 had experienced that particular aspect of HHWI over the prior 30 days. Correlation coefficients  
 257 were calculated between cumulative daily recall and responses from the 31<sup>st</sup> day.

## 258 **Data Analyses**

259 Quantitative data analyses were conducted in six phases including descriptive analyses,  
 260 item reduction, extraction of factors, tests of dimensionality, scale reliability, and validity (Table  
 261 2). Software packages used included *MPlus* version 7.40 (Los Angeles, CA: Muthén & Muthén)  
 262 [61], SPSS version 20.0 (Armonk, NY: IBM Corp.) and STATA version 14 (College Station,  
 263 TX: StataCorp LP). Tests of dimensionality were conducted using data from 18 months  
 264 postpartum (n=186); the rest of the analyses were done using data from 15 months postpartum  
 265 (n=241).

266 **Table 2. Analytical procedures for the construction and development of household water**  
 267 **insecurity scale among postpartum women in western Kenya.**

| Concept                        | Purpose                                                                | How assessed                                                                               | References |
|--------------------------------|------------------------------------------------------------------------|--------------------------------------------------------------------------------------------|------------|
| <b>A. Descriptive Analyses</b> |                                                                        |                                                                                            |            |
| Summary statistics             | To examine the distribution of all scale items and measured variables. | Conducted a summary statistics of scale items and all measured variables relevant to HHWI. |            |
| <b>B. Item Reduction</b>       |                                                                        |                                                                                            |            |
| Adequate Variance              | To examine the variation between items in HHWI scale                   | Analyzed the distribution of items for HHWI.                                               | [62]       |

| <b>Concept</b>                                          | <b>Purpose</b>                                                                                                                                      | <b>How assessed</b>                                                                                                                                     | <b>References</b> |
|---------------------------------------------------------|-----------------------------------------------------------------------------------------------------------------------------------------------------|---------------------------------------------------------------------------------------------------------------------------------------------------------|-------------------|
| Polychoric Correlations (Inter-item)                    | To determine the correlations between scale items.                                                                                                  | Estimated average inter-item correlation coefficient, help to determine which items to drop.                                                            | [61,63,64]        |
| Polyserial Correlations (Item-total)                    | To determine the correlation between individual scale items with the sum score of all scale items.                                                  | Estimated adjusted item-total correlation coefficients, help to determine which items to drop.                                                          | [61,63,64]        |
| Item Communalities                                      | To determine the measurement error in each item or the true score variance.                                                                         | Estimated using principal axis factoring.                                                                                                               | [62]              |
| Kaiser-Meyer-Olkin (KMO) Test for sampling adequacy     | To measure the proportion of common variance among items and determine whether the data is suitable for factor analysis.                            | Estimated the sampling adequacy for each item in the model and for the complete model. KMO values between 0.8 and 1 indicate the sample is adequate.    | [65]              |
| Bartlett Test of Sphericity                             | To compare the observed correlation matrix to the identity matrix.                                                                                  | Tested the null hypothesis that the correlation matrix has an identity matrix.                                                                          | [66–68]           |
| <b>C. Extraction of Factors</b>                         |                                                                                                                                                     |                                                                                                                                                         |                   |
| Exploratory Factor Analysis (latent Structure)          | To measure the structure of a set of observed variables and identify the subset of variables that corresponds to each of the underlying dimensions. | Factor analysis of retained twenty items used together with the Guttman-Kaiser >1 rule and Cattell's scree plot.                                        | [61,64,69–72]     |
| Parallel Analysis                                       | To identify the possible number of factors that can be developed from the data.                                                                     | Estimated number of identifiable factors from scale items. This was a form of sensitivity analysis to the exploratory factor analysis.                  | [73,61,64,70]     |
| Model Fit Assessment                                    | To determine the fitness of both factor and parallel analyses to the data.                                                                          | Examined model fit indices against acceptable thresholds ( <b>S3 Table</b> ).                                                                           | [74–81]           |
| <b>D. Tests of Dimensionality</b>                       |                                                                                                                                                     |                                                                                                                                                         |                   |
| Confirmatory Factor Analysis (Latent Variable Modeling) | To address queries on the latent structure of scale items and their underlying relationships. i.e. to validate previous EFA results.                | Factor analysis of items via Structural Equation Modeling. This also helped with the determination of construct validity of the HHWI scale.             | [61,69,82,83]     |
| Bifactor Analysis                                       | To evaluate dimensionality-related questions.                                                                                                       | With bifactor analysis, the factor loadings of the general factor were compared to the group factors to help determine the dimensionality of the scale. | [84–86]           |
| Model Fit Assessment                                    | To determine the fitness of both confirmatory factor analysis and bifactor modeling solutions.                                                      | Examined model fit indices against acceptable thresholds ( <b>S3 Table</b> )                                                                            | [74–81]           |
| <b>E. Scale Reliability</b>                             |                                                                                                                                                     |                                                                                                                                                         |                   |

| Concept                           | Purpose                                                                                                                                        | How assessed                                                                                                                                                                            | References |
|-----------------------------------|------------------------------------------------------------------------------------------------------------------------------------------------|-----------------------------------------------------------------------------------------------------------------------------------------------------------------------------------------|------------|
| Intra-respondent reliability      | To assess the stability and consistency of responses by respondents on scale items.                                                            | Correlated the sum score of daily retrospective responses on HHWI items for 30 days with scores on a 30-day recall.                                                                     | [87]       |
| Coefficient alpha                 | To assess the internal consistency of the scale. i.e., the degree to which the set of items in the scale co-vary, relative to their sum score. | Calculated Cronbach's alpha for scale items at 15 months postpartum and 18 months postpartum.                                                                                           | [88]       |
| Coefficient of stability          | To assess the degree to which the participant's performance is repeatable; i.e. how consistent their scores are across time.                   | Estimated the coefficient of stability via Test-retest reliability. This was indexed by the correlation coefficient of two assessments of HHWI at two different time points.            | [63,64,89] |
| <b>F. Scale Validity</b>          |                                                                                                                                                |                                                                                                                                                                                         |            |
| Predictive validity               | To determine the degree to which test scores predict criterion measurements to be made in the future.                                          | Estimated the association between HHWI and maternal stress to food insecurity scores.                                                                                                   | [63,64]    |
| Convergent validity               | To examine the evidence that the same concept measured in different ways yields similar results.                                               | Estimated the correlation between HHWI and water quality ( <i>E.coli</i> concentrations), time to water collection, amount spent on water for household, and season of data collection. | [89–91]    |
| Discriminant validity             | To examine the evidence that the concept measured is different from other closely related concepts.                                            | Estimated the correlation between HHWI and per capita household water use. Indicated by predictably low correlations between HHWI and other measures.                                   | [89–91]    |
| Differentiation by 'known groups' | To examine the degree to which the concept measured behaves as expected in relation to 'known groups'.                                         | Estimated a differential test of means for maternal HIV status, season, water quality, and source of drinking water.                                                                    | [89–91]    |

## 268 **A. Descriptive analyses**

269 First, we estimated proportions, means, and standard deviations of the HHWI module and  
 270 participant characteristics. Although there were 5-response categories for the scale items  
 271 originally, the sample distribution was skewed to the right (<5%) for “always” for each item.  
 272 Therefore, “often” and “always” were collapsed for subsequent analyses.

## 273 **B. Item Reduction**

274 We first assessed adequate variance for all HHWI items [62]. This was followed by  
275 polychoric (inter-item) and polyserial (item-total) correlation of scale items [61,63,64]. Items  
276 without adequate variance, very low inter-item ( $<0.3$ ) and item-total correlations ( $<0.3$ ), very  
277 high residual variances ( $>0.50$ ), and high missing cases ( $>10\%$ ) were dropped. We also  
278 estimated item communalities for degree of common variance between items [62], the Kaiser-  
279 Meyer-Olkin measure for sampling adequacy [65], and the Bartlett test of sphericity [66–68] to  
280 ensure our item reduction approach was robust. Furthermore, one item was dropped for any two  
281 items that suggested collinearity ( $\geq 0.98$ ).

## 282 **C. Extraction of Factors**

283 Multiple approaches were used to determine the number of factors to retain. Exploratory  
284 factor analysis (EFA) was used together with Guttman's [92] eigenvalue rule of lower bound,  
285 Kaiser's [71] eigenvalue  $>1$  rule, Cattell's [72] scree test, and Horn's [73] parallel analysis (PA)  
286 to determine the optimal number of factors that fit the data at 15 months postpartum  
287 [73,61,64,70]. For the scree tests, the root of the scree was used as a point of extraction for the  
288 true number of factors [72]. The extraction process in all the models used oblique rotation with  
289 weighted least squares with mean and variance adjustment (WLSMV) estimator except for  
290 Horn's PA, which employed the maximum likelihood (ML) estimator. For sensitivity analysis,  
291 we employed principal axis factors.

292 A number of model fit statistics were used to determine meaningful model fitness for  
293 both traditional factor and parallel analyses (**S3 Table**). The fit indices included Chi-square test  
294 of model fit, the Tucker Lewis Index ( $TLI \geq 0.95$ ), the Comparative Fit Index ( $CFI \geq 0.95$ ), the



295 Root Mean Square of Error of Approximation ( $RMSEA \leq 0.10$ ), and the Standardized Root Mean  
296 Square Residual ( $SRMR \leq 0.08$ ) [74–81]. Consistent with the factor structure of previous  
297 household water insecurity scales elsewhere [2–4,36,40], we assumed our model will produce  
298 similar factor structure for our scale.

#### 299 **D. Tests of Dimensionality**

300 In order to test the factor structure obtained from the EFA, a test of scale dimensionality was  
301 conducted using confirmatory factor analysis (CFA) and bifactor or nested factor modeling on an  
302 independent sample at 18 months postpartum. The CFA allows for the test of dimensionality of  
303 the hypothesized factors [61,69,82,83]. Complementarily, the bifactor model allows researchers  
304 to extract a primary unidimensional construct while recognizing the multidimensionality of the  
305 construct [84–86]. The bifactor model assumes each item loads on two dimensions. The first is a  
306 general latent trait or factor that underlies all the scale items and the second, a group factor. This  
307 approach allows researchers to examine any distortion that may occur when unidimensional CFA  
308 models are fit to multidimensional data [84–86].

309 To determine whether to retain a construct as unidimensional or multidimensional, the  
310 factor loadings from the general factor are compared to those from the group factors (sub scales)  
311 [85,86]. Where the factor loadings on the general factor are significantly larger than the group  
312 factors, a unidimensional scale is implied [85,93]. The model fitness of both the confirmatory  
313 factor and bifactor models were assessed using TLI, CFI, RMSEA and the Weighted Root Mean  
314 Square Residual [74–81] (**S3 Table**).

## 315 **E. Scale Reliability**

316 We assessed intra-respondent reliability of scale items retrospectively by comparing daily  
317 recall across 30 days with the sum score of a retrospective recall on the 31<sup>st</sup> day. This was to  
318 assess the stability and consistency of responses on scale items.

319 The reliability of the scale itself was estimated using coefficient alpha and the coefficient  
320 of stability. First, Cronbach's coefficient alpha of scale items was calculated for the samples at  
321 15 and 18 months postpartum to compare and correlate the observed score variation between  
322 each of the items in the scales for both samples [81]. Second, we assessed the coefficient of  
323 stability (test-retest reliability), which involved the correlation of scale scores at 15 and 18  
324 months postpartum [63,64,89].

## 325 **F. Scale Validity**

326 We used predictive (criterion), construct (convergent and discriminant) validity and  
327 differentiation between 'known groups' to assess scale validity. Predictive (criterion) validity  
328 was assessed by examining the associations between HHWI and perceived maternal stress as  
329 well as food insecurity [56,57].

330 Convergent validity was measured against time to and from water source and amount of  
331 money spent on purchasing water in the past month. We calculated Pearson product-moment  
332 correlations based on Fisher's transformation [89–91].

333 Discriminant validity was assessed by correlating HHWI with per capita water used daily  
334 [89–91], which has similarly been used in previous studies [2,3,36]. Consistent with the findings  
335 of Tsai et al [3], Hadley and Wutich [36], and Stevenson et al. [2], we assumed that there would

336 be little or no relationship between HHWI and per capita water used, i.e. that HHWI is distinct  
337 from household water *use*.

338 As a final measure of validity, we assessed the scale score by differentiating the position  
339 of ‘known groups’. In other words, we expected to have significantly higher HHWI scores for  
340 participants whose water was contaminated with *Escherichia coli* (*E.coli*), were HIV positive,  
341 those who used unimproved sources of water, and during the dry season. We used Student’s *t*-  
342 test for this analysis.

### 343 **IRB Approval**

344 We obtained approval for this study from the Institutional Review Boards at Cornell  
345 University, Northwestern University, and the Kenyan Medical Research Institute Scientific and  
346 Ethics Review Committee. Also, we obtained written informed consent from all participants in  
347 this study.

## 348 **Results**

### 349 **Initial household water insecurity module**

350 Formative work in Phase 1 resulted in the creation of 29 HHWI questions (Activity E,  
351 Table 1). The cognitive interviews (Activity F) indicated people were able to understand the  
352 intended meaning and could accurately repeat the questions. Responses from cognitive  
353 interviews resulted in the adjustment of the structure of the questions and the retraining of  
354 interviewers on how to ask questions without ambiguity and the avoidance of leading prompts.  
355 The response options that were considered appropriate for a 4-week recall period were “never”

356 (0), “rarely” (meaning 1-2 times), “sometimes” (3-10 times), “often” (10-20 times) and “always”  
357 (>20 times).

## 358 **Participant Characteristics**

359 Of the 241 participants who were interviewed at 15 months postpartum, the mean  
360 household size was 3.5 with a range of 1-12 members (Table 3). The majority of women (90.5%)  
361 interviewed were primiparous, 51.5% were HIV positive, and the mean age was 25 (range 18-39)  
362 years. Participants who lived in rural (35.3%) and peri-urban (21.6%) regions comprised the  
363 majority of the sample. Consistent with the general demography of Nyanza region, 52.5% of the  
364 sample had primary education and 8.8% had college education. The mean Individual Food  
365 Insecurity Access Score was 5.4 (SD=5.5) with a Cronbach’s alpha of 0.90. Participants had a  
366 mean perceived stress score of 17.3 (SD=4.3) [94], with a Cronbach’s alpha of 0.70. For the 15-  
367 month postpartum visit, most of the participants (62.2%) were interviewed during the rainy  
368 season (Table 3).

369

370 Table 3. Socio-demographic, water access and use among Kenyan Women of mixed HIV status  
371 at 15 months postpartum (N=241)

| <b>Characteristics (range)</b>                                                                                      | <b>Mean (SD)</b> |
|---------------------------------------------------------------------------------------------------------------------|------------------|
| Household size (1-8)                                                                                                | 4.1 (2.1)        |
| Maternal Age (18-39)                                                                                                | 25.0 (4.6)       |
| Primiparous (%)                                                                                                     | 90.5             |
| Married (%)                                                                                                         | 91.2             |
| Unemployed (%)                                                                                                      | 36.8             |
| Educational status (%)                                                                                              |                  |
| No Education                                                                                                        | 3.33             |
| Primary Education                                                                                                   | 52.5             |
| Secondary Education                                                                                                 | 35.4             |
| College Education                                                                                                   | 8.8              |
| HIV negative <sup>1</sup> (%)                                                                                       | 48.5             |
| Place of Residence (%)                                                                                              |                  |
| Peri-urban                                                                                                          | 21.58            |
| Rural                                                                                                               | 35.27            |
| Individual Food Insecurity Score (0-21)                                                                             | 5.4 (5.5)        |
| Maternal Perceived Stress Scores (3-30)                                                                             | 17.3 (4.3)       |
| Season of interview (rainy <sup>2</sup> ) (%)                                                                       | 62.2             |
| <b>Household Characteristics of Water Acquisition and Use</b>                                                       | <b>Mean (SD)</b> |
| <b>Source:</b>                                                                                                      |                  |
| Unimproved <sup>3</sup> water source (n=195) (%)                                                                    | 41.0             |
| Women without access to water in household (%)                                                                      | 53.9             |
| <b>Costs:</b>                                                                                                       |                  |
| Amount spent per month on water (USD <sup>4</sup> ) by women with no access to water in household (n=130) (0-15.00) | 1.65 (0.33)      |
| Amount spent per month on water treatment across all households (USD) (0-2.00)                                      | 0.21 (0.37)      |
| <b>Time:</b>                                                                                                        |                  |
| Time to fetch water among women with no access to water in household (mins/per trip) (2-120 mins)                   | 23.0 (20.8)      |
| Mean number of trips per week for women with no access to water in household (0-84)                                 | 16.5 (13.7)      |
| Mean total time per week spent in water acquisition among women with no access to water in household (hours) (0-21) | 5.6 (4.8)        |
| <b>Use:</b>                                                                                                         |                  |
| Per capita total daily water use in liters <sup>5</sup> (20.6-173)                                                  | 65.5 (41.7)      |
| <b>Source:</b>                                                                                                      |                  |
| Total stored household drinking water in liters <sup>5</sup> (n=27) (0.25-20)                                       | 6.5 (4.7)        |
| Total stored household water [excluding drinking water] <sup>5</sup> (0-368)                                        | 70.1 (96.9)      |
| Prevalence of Escherichia coli <sup>6</sup> (≥100 ml) in stored household drinking water (n=27) (%)                 | 51.8             |

**Notes.**<sup>1</sup>HIV-infected women were oversampled to achieve 1:1 serostatus ratio; <sup>2</sup>Rainy months in this dataset were May and October; <sup>3</sup>Unimproved water sources include unprotected dug well, unprotected spring, surface water; Improved water source include piped water, stand pipe, bore hole, protected dug well, protected spring, rain water; <sup>4</sup>USD=United States Dollar converted in May 2016; <sup>5</sup>These data were collected in a subset of 27 households (Activity J); <sup>6</sup>the presence of *E.coli* was tested using compartment bag test assay.

## 372 **Water access and use**

373           Of the 241 participants interviewed, nearly half (41.0%) used drinking water from  
374 unimproved sources, and 53.9% did not have access to water in their households or compounds.  
375 Of the women who had access to water in their households, 8.8% were unimproved sources.  
376 Women with no access to water in their households spent a mean amount of 1.60 USD; with a  
377 range of 0 to 15.00 US dollars a month on water acquisition. The mean amount spent on water  
378 treatment across all households was 0.21 USD. Women without access to water in their  
379 households spent a mean time of 23.0 minutes per trip and 16.5 trips per week acquiring water  
380 for their households, for a mean of 5.6±4.8 hours per week. In 27 households in which we had  
381 data to assess water use and microbial analysis, a mean of 65.5 liters of water was used daily by  
382 households, 6.5 liters were stored for drinking, and a mean of 70.1 were stored for other uses.  
383 For microbial analysis, 51.8% (14 out of 27) of the households tested positive (≥100 ml) for  
384 *E.coli* in stored drinking water (Table 3).

385  
386  
387  
388  
389  
390

391 **Table 4. Frequency distribution of response categories and polychoric/polyserial**  
392 **correlation coefficients for household water insecurity items among women in western**  
393 **Kenya at 15 months postpartum, from highest to the lowest frequency (n=241).**

| Scale Item               | Response Categories |        |           |                  |      | Item |      | Polychoric Correlation Coefficients | Polyserial Correlation Coefficients |
|--------------------------|---------------------|--------|-----------|------------------|------|------|------|-------------------------------------|-------------------------------------|
|                          | Never               | Rarely | Sometimes | Often/<br>Always | Ever | M    | SD   |                                     |                                     |
| Worry Enough (Q1)        | 53.7                | 26.2   | 16.4      | 3.7              | 46.3 | 0.70 | 0.87 | 0.73-0.88                           | 0.79                                |
| Unsafe drinking (Q22)    | 55.1                | 23.4   | 17.8      | 3.7              | 44.9 | 0.70 | 0.89 | 0.68-0.80                           | 0.80                                |
| Water treatment (Q21)    | 60.3                | 21.0   | 15.0      | 3.7              | 39.7 | 0.62 | 0.87 | 0.71-0.99                           | 0.88                                |
| Laundry (Q14)            | 61.2                | 22.0   | 14.5      | 2.3              | 38.8 | 0.58 | 0.82 | 0.78-0.92                           | 0.90                                |
| Angry/Frustrated (Q3)    | 61.7                | 23.4   | 13.6      | 1.4              | 38.3 | 0.55 | 0.78 | 0.67-0.88                           | 0.74                                |
| Children (Q19)           | 61.7                | 26.2   | 10.8      | 1.4              | 38.3 | 0.52 | 0.74 | 0.77-0.92                           | 0.85                                |
| Toileting (Q18)          | 62.6                | 17.8   | 17.3      | 2.3              | 37.4 | 0.59 | 0.85 | 0.68-0.89                           | 0.83                                |
| Unsafe fetching (Q5)     | 63.1                | 21.0   | 14.5      | 1.4              | 36.9 | 0.54 | 0.79 | 0.73-0.91                           | 0.86                                |
| Income (Q8)              | 65.1                | 21.0   | 11.2      | 1.9              | 34.9 | 0.49 | 0.76 | 0.72-0.97                           | 0.83                                |
| Enough drinking (Q25)    | 65.9                | 26.6   | 7.0       | 0.5              | 34.1 | 0.42 | 0.64 | 0.75-0.91                           | 0.82                                |
| Child Care (Q9)          | 66.8                | 21.0   | 9.8       | 2.3              | 33.2 | 0.48 | 0.77 | 0.73-0.87                           | 0.85                                |
| Body washing (Q20)       | 67.3                | 21.5   | 10.3      | 0.9              | 32.7 | 0.45 | 0.72 | 0.77-0.93                           | 0.85                                |
| Borrow (Q12)             | 67.8                | 20.6   | 9.4       | 2.3              | 32.2 | 0.46 | 0.76 | 0.73-0.88                           | 0.84                                |
| Felt dirty (Q16)         | 70.1                | 20.1   | 9.4       | 0.5              | 29.9 | 0.40 | 0.68 | 0.73-0.96                           | 0.87                                |
| Missed meetings (Q15)    | 70.1                | 19.2   | 9.4       | 1.4              | 29.9 | 0.42 | 0.72 | 0.74-0.87                           | 0.86                                |
| Cooking (Q17)            | 70.6                | 18.7   | 9.8       | 0.9              | 29.4 | 0.41 | 0.70 | 0.71-0.90                           | 0.89                                |
| Neighbour argument (Q23) | 71.5                | 22.0   | 6.5       | 0.0              | 28.5 | 0.35 | 0.60 | 0.74-0.86                           | 0.80                                |
| Medications (Q26)        | 73.4                | 20.1   | 5.6       | 0.9              | 26.6 | 0.34 | 0.63 | 0.71-0.86                           | 0.82                                |
| Sleep thirsty (Q28)      | 76.2                | 21.0   | 2.3       | 0.5              | 23.8 | 0.27 | 0.52 | 0.79-0.92                           | 0.91                                |
| No water (Q29)           | 80.8                | 15.0   | 3.7       | 0.5              | 19.2 | 0.24 | 0.53 | 0.71-0.86                           | 0.82                                |

**Notes:** "Never" =0, "Rarely"=1-2 times in prior 4 weeks, "Sometimes"=3-10 times in prior 4 weeks, "Often/always" in prior 4 weeks=11+ times, Ever  $\geq 1$  in prior 4 weeks; polychoric correlation coefficients=inter item correlation; polyserial correlation coefficients=item-total correlation

394

395 The most severe manifestations of water insecurity, such as sleeping thirsty and having no water  
396 in the household whatsoever, were least endorsed (23. 8% and 19.2%) in this population (Fig. 1,  
397 Table 4). Items that reflected less severe expressions of water insecurity, including worrying  
398 about having enough water and drinking water that was considered to be unsafe, were  
399 considerably more common (46.3% and 44.9% respectively), with 3.7% experiencing these  
400 events often or always (Fig.1, Table 4).

401 **Fig 1. The distribution of response categories for all 29 Household Water**  
402 **Insecurity Scale Items at 15 months postpartum with total responses (n=241).**

403 **Item Reduction**

404 In total, nine scale items were dropped from the 29-question survey (Fig. 1). We first  
405 dropped two questions related to horticulture and livestock because they had negative and weak  
406 inter-item (<0.3) and item total (<0.3) correlation coefficients. Also, questions on both  
407 horticulture (13.7%) and livestock (14.9%) had high missing cases. Further, six items (Leaving  
408 Town, Miss School, Household Arguments, Loan Water, Too Sick, and Buy Water) were  
409 dropped due to their very large residual variances (>0.5) and very low communalities (<0.3). A  
410 final item, Chores, was dropped because its very high correlation ( $r=0.98$ ) with 'Childcare'  
411 created redundancy in items.

412 We then investigated inter-item (polychoric) and item-total (polyserial) correlations  
413 (Table 4). Inter-item correlations were strong, ranging from 0.67 to 0.97 for the remaining 20  
414 items. Polyserial coefficients also showed very strong item-total correlations, ranging from 0.74  
415 to 0.90, with an average item-total correlation of 0.84. Our Sensitivity tests showed the  
416 communalities in the 20 remaining items were all above 0.69, suggesting each of the items had  
417 some common variance with other items. The Kaiser-Meyer-Olkin measure of sampling  
418 adequacy was 0.94, above the recommended value of 0.60, and the Bartlett's sphericity test was  
419 significant ( $\chi^2(190) = 4436.25, p < .001$ ). These indicators suggested that all 20 items should be  
420 used to explore the number of factors behind the correlation matrix [64,67,68].

421 **Extraction of Factors**

422 To understand the latent factor structure of our items, we used EFA and the Guttman-  
423 Kaiser rule to extract two factors from the data with initial eigenvalues of 15.86 for factor one  
424 and 1.02 for factor two (Table 5). This was confirmed by Horn's parallel analysis with



425 eigenvalues 13.33 and 2.24 for factors one and two respectively. However, the amounts of  
 426 variation explained by the first factor in both analyses were much bigger (79.3% and 66.7%  
 427 respectively) suggesting a single underlying factor for HHWI [85]. Further, an evaluation of  
 428 scree plots in both analyses showed a single dominant factor (**S2 Fig**). Specifically, the line for  
 429 the average simulated eigenvalue was above the empirical factor 2 eigenvalue (**S3 Fig**). This also  
 430 suggested a one-factor solution was most appropriate.

431  
 432 **Table 5. Model fit indices of factor extraction at 15 months postpartum and tests of**  
 433 **dimensionality at 18 months postpartum.**

| <b>Factor Extraction (N=241)</b>       |                                    |                       |                        |                    |                  |                  |                   |
|----------------------------------------|------------------------------------|-----------------------|------------------------|--------------------|------------------|------------------|-------------------|
| <b>Rotation</b>                        | <b>Analytical Technique</b>        | $\chi^2$ <sup>3</sup> | <i>df</i> <sup>4</sup> | RMSEA <sup>5</sup> | CFI <sup>6</sup> | TLI <sup>7</sup> | SRMR <sup>8</sup> |
| Geomin Oblique                         | EFA <sup>1</sup> : HHWI (20 items) |                       |                        |                    |                  |                  |                   |
|                                        | 1 Factor (Ev <sup>2</sup> =15.86)  | 1144                  | 170                    | 0.15               | 0.97             | 0.97             | 0.06              |
|                                        | 2 Factors (Ev=1.02)                | 526.1                 | 151                    | 0.10               | 0.99             | 0.99             | 0.04              |
| <b>Tests of Dimensionality (N=186)</b> |                                    | $\chi^2$              | <i>df</i>              | RMSEA              | CFI              | TLI              | WRMR <sup>9</sup> |
| Geomin Oblique                         | CFA <sup>10</sup> (1 Factor)       | 1079.4                | 170                    | 0.17               | 0.96             | 0.96             | 2.05              |
| Bi-Geomin Oblique                      | Bifactor                           | 412.9                 | 150                    | 0.09               | 0.99             | 0.98             | 0.94              |

**Notes:** <sup>1</sup>Exploratory Factor Analysis; <sup>2</sup>Eigenvalues; <sup>3</sup>chi-square goodness of fit statistic; <sup>4</sup>degrees of freedom; <sup>5</sup>RMSEA ( $\leq 0.10$ ) = Root Mean Square Error of Approximation; <sup>6</sup>CFI ( $> 0.95$ ) = Comparative Fit Index; <sup>7</sup>TLI ( $> 0.95$ ) = Tucker Lewis Index; <sup>8</sup>SRMR ( $\leq 0.08$ ) = Standardized Root Mean Square Residual; <sup>9</sup>WRMR ( $< 1.0$ ) = Weighted Root Mean Square Residual; <sup>10</sup>Confirmatory Factor Analysis. All chi-square goodness-of-fit tests were statistically significant at  $p < 0.001$ .

435  
 436 An evaluation of the factor loadings associated with the eigenvalues produced two  
 437 solutions, a one-factor model and two-factor model (Table 6). An examination of the factor  
 438 loadings for the two-factor model showed three statistically significant cross loading items  
 439 [toileting (0.75 vs. 0.32), unsafe drinking (0.52 vs. 0.68), and water treatment (0.70 vs. 0.50)].  
 440 However, the scores on the dominant factor were comparatively higher than the second factor,  
 441 supporting a single dominant factor [84,85,95].

442 **Table 6. Factor loadings based on exploratory factor analysis of 20 household water**  
 443 **insecurity items at 15 months postpartum showing one-and-two factor solutions (n=241).**  
 444

| Items             | Traditional Factor Model |      |      |
|-------------------|--------------------------|------|------|
|                   | 1-F                      | 2-F  |      |
|                   | 1                        | 1    | 2    |
| Worry enough      | 0.86                     | 0.83 |      |
| Unsafe drinking   | 0.76                     | 0.52 | 0.68 |
| Water treatment   | 0.90                     | 0.70 | 0.50 |
| Laundry           | 0.95                     | 0.95 |      |
| Angry/frustrated  | 0.81                     | 0.79 |      |
| Children          | 0.91                     | 0.88 |      |
| Toileting         | 0.85                     | 0.75 | 0.32 |
| Unsafe fetching   | 0.91                     | 0.88 |      |
| Income            | 0.95                     | 0.98 |      |
| Enough drinking   | 0.96                     | 0.94 |      |
| Childcare         | 0.96                     | 1.00 |      |
| Body washing      | 0.94                     | 0.95 |      |
| Borrow            | 0.89                     | 0.90 |      |
| Felt dirty        | 0.92                     | 0.99 |      |
| Missed meetings   | 0.88                     | 0.97 |      |
| Cooking           | 0.94                     | 0.94 |      |
| Neighbor argument | 0.88                     | 0.90 |      |
| Medications       | 0.89                     | 0.89 |      |
| Sleep thirsty     | 0.88                     | 0.87 |      |
| No water          | 0.90                     | 0.91 |      |

Notes: 1-F=One factor model; 2-F=Two factor model; we show in this table only factor loadings that were significant ( $p \leq 0.05$ )

445  
 446 All four model fit indices used in this study showed very strong support for a single  
 447 dominant factor—RMSEA (0.10), CFI (0.99), TLI (0.99), and SRMR (0.04) (**S3 Table**).  
 448 Therefore, we selected a unidimensional scale with 20 items. All factor loadings for the  
 449 unidimensional scale were high with a minimum of 0.64 and a maximum of 0.99 all above the  
 450 recommended threshold of 0.40 (Table 6). Based on the results, we hypothesized that the  
 451 remaining 20 items would represent a single construct i.e. a unidimensional scale (Table 7).

452 **Table 7. Final household water insecurity scale questions validated for use among**  
453 **postpartum women in Nyanza, Kenya.**

---

For each item, the questions followed the same format “In the last 4 weeks, how frequently...”

---

- 1 Did you worry you would not have enough water for all of your household needs?
- 2 Did you feel angry or frustrated that you would not have enough water for all of your household needs?
- 3 Did you worry about the safety of the person getting water for your household?
- 4 Has the time spent fetching water prevented anyone in your household from earning money?
- 5 Has the time spent fetching water prevented you or anyone in your household from caring for your children?
- 6 Has anyone in your household asked to borrow water from other people?
- 7 Has there not been enough water in the household to wash clothes?
- 8 Have you missed meetings in your community (church, funerals, community meetings, etc.) because there wasn't enough water?
- 9 Have you missed meetings in your community (church, funerals, community meetings, etc.) because you lacked water to take a bath and you felt too dirty to go?
- 10 Have you or anyone in your household had to change what was being cooked because there wasn't enough water?
- 11 Did you or anyone in your household had to go without washing hands after defecating, changing diapers, or other dirty activities because you didn't have enough water?
- 12 Did you not have enough water to wash your children's face and hands?
- 13 Did you or anyone in your household have to go without washing their body because there wasn't enough water?
- 14 Did you or anyone in your household want to treat your water, but couldn't? By treat I mean boiling, using chemicals to treat, or other ways you make your water safe to use or drink.
- 15 Did you or anyone in your household actually had to drink water that you thought was unsafe?
- 16 Did you have problems with water that caused arguments/trouble with neighbors or others in the community?
- 17 Has there not been as much water to drink, as you would like for you or members of your household?
- 18 Have you or anyone in your household not had enough water to take medications?
- 19 Have you or anyone in your household gone to sleep thirsty?
- 20 Have you had no water whatsoever in your household?

---

**Notes:** For each question, participants were asked to respond to one of the following options Never (0), Rarely (1-2 times in prior 4 weeks), Sometimes (3-10 times in prior 4 weeks), Often (11-20 times in prior 4 weeks), Always (above 20 times in prior 4 weeks). Questions were asked from the least to the most severe manifestations of water insecurity.

454

## 455 **Tests of Dimensionality**

456 We then tested this hypothesis using confirmatory factor model and a bifactor model on

457 the second sample collected at 18 months postpartum. The confirmatory factor analysis test of

458 dimensionality found partial support for our unidimensional model through the model fit indices  
459 [RMSEA (0.17), CFI (0.96), TLI (0.96), WRMR (2.05)] (Table 5). The standardized estimates  
460 from the confirmatory factor analysis were all significant at  $p < 0.001$  (Fig 2A). The bifactor  
461 model focused on accounting for unrecognized distortions created by the three items with cross  
462 loadings (Fig 2B). Reise et al. [85] suggest that where the factor loadings of the  
463 general/dominating factor are greater than the subfactor, a unidimensional factor is implied. In  
464 this analysis, the factor loadings in the dominating factor were greater than the group factor, thus  
465 pointing to a unidimensional factor. The standardized estimates on the general factor were all  
466 significant at  $p < 0.001$  (Fig 2B). Additionally, all four model fit indices [RMSEA (0.09), CFI  
467 (0.99), TLI (0.98), WRMR (0.94)] showed strong support and suggested the unidimensional  
468 hypothesis was plausible. Based on the results, we failed to reject the hypothesis that the HHWI  
469 scale consisting of 20 items was homogeneous.

470 **Fig 2A. Confirmatory factor analysis with standardized estimates for household water**  
471 **insecurity scale at 18 months postpartum (n=186).**

472 **Fig 2B. Bi-factor analysis with standardized estimates for household water insecurity scale**  
473 **at 18 months postpartum (n=186).**

474 Once dimensionality was confirmed, we then summed the responses from the 20-item  
475 HHWI scale at both 15 and 18 months postpartum to create two composite scores. At 15 months  
476 postpartum, the mean of HHWI was  $9.5 \pm 12.2$  (Mean  $\pm$  SD), with a range of 0-59 (Fig 3). At 18  
477 months postpartum, the mean of HHWI was  $10.1 \pm 12.4$  (Mean $\pm$ SD), with a range of 0-57.

478 **Fig 3. The distribution of household water insecurity scores at 15 months postpartum**  
479 **among women in western Kenya (n=241).**

### 480 **Scale Reliability**

481 Our test of intra-responder reliability of the scale questions produced a strong  
482 correlation coefficient ( $r=0.76$ , 95% CI: 0.50-0.72;  $p \leq 0.001$ ) between the daily responses of

483 participants and the retrospective responses of participants on an earlier 20-item version of the  
484 scale.

485 In exploring the reliability of HHWI scale across time, we first computed the Cronbach's  
486 alpha for scale items at 15 and 18 months postpartum. At both 15 and 18 months postpartum, the  
487 20-item scale produced a Cronbach's alpha of 0.97 (Table 8). These results suggest the internal  
488 consistency of the items at the two-time points were above all published thresholds for  
489 satisfactory reliability ( $\alpha=0.70$ ,  $\alpha=90$ ,  $\alpha=95$ ) [88,90,96]. Secondly, we assessed test-retest  
490 reliability, which correlates the scores on a given scale at two different time points to give us the  
491 coefficient of stability. Our estimation with the 20-item scale produced a positive correlation  
492 coefficient ( $r=0.62$ , 95% CI: 0.50-0.72;  $p\leq 0.001$ ); however, it was below the recommended  
493 threshold ( $\leq 0.70$ ) for the true reliability of the scale items [63,88,96].

494 **Table 8. Reliability coefficients of the household water insecurity scale**

|                   | Cronbach's alpha | Coefficient of Stability |
|-------------------|------------------|--------------------------|
| 15 months (n=241) | 0.97             | 0.62                     |
| 18 months (n=186) | 0.97             |                          |

495

## 496 **Scale Validity**

497 To assess predictive criterion validity, we regressed maternal stress and food insecurity  
498 on HHWI score, and found HHWI to be significantly positively correlated with increased  
499 maternal perceived stress ( $b=0.12$ , 95% CI: 0.07-0.16,  $p\leq 0.001$ ;  $\beta=0.34$ ) and food insecurity  
500 ( $b=0.08$ , 95% CI: 0.08-0.66,  $p\leq 0.01$ ;  $\beta=0.18$ ).

501 To test convergent validity, our analyses showed statistically significant correlations  
502 between HHWI and total time spent per week among all households to acquire water ( $r=0.41$ ,

503 95% CI: 0.23-0.57,  $p \leq 0.001$ ) and total amount of money spent on water in the last month  
504 ( $r=0.25$ , 95% CI: 0.12-0.37,  $p \leq 0.001$ ) at 15 months postpartum. Similar results were obtained at  
505 18 months postpartum for total time per week acquiring water ( $r=0.38$ , 95% CI: 0.24-0.51,  $p \leq$   
506 0.001) and amount of money spent on water ( $r=0.20$ , 95% CI: 0.05-0.35,  $p \leq 0.01$ ).

507 To assess discriminant validity, we tested if there would be a low or no relationship  
508 between HHWI and per capita household water use. This relationship was not statistically  
509 significant ( $r=0.12$ , 95% CI, -0.30-0.50,  $p=0.59$ ).

510 We also examined the differences between 'known groups' on HHWI scores. Our results  
511 showed that although the magnitude of the means for the groups measured was in the expected  
512 direction, they were not statistically significant. The mean HHWI scores for participants with  
513 *E.coli* present in their household drinking water was higher (18.40 vs. 12.85;  $t=1.05$ ,  $p=0.30$ ;  
514 Point-Biserial  $r=0.22$ , Cohen's  $d=0.44$ ). Mean HHWI scores were higher in the dry season than  
515 in the wet season (11.15 vs. 8.69;  $t=1.43$ ,  $p=0.12$ ; Point-Biserial  $r=0.10$ , Cohen's  $d=0.21$ ). HIV  
516 positive women had higher mean HHWI scores than HIV negative women (11.04 vs. 8.03;  $t=-$   
517 1.80,  $p=0.07$ ; Point-Biserial  $r=-0.12$ , Cohen's  $d=-0.25$ ), as did households relying on  
518 unimproved water sources (11.67 vs. 8.45;  $t=-1.62$ ,  $p=0.11$ ; Point-Biserial  $r=-0.12$ , Cohen's  $d=-$   
519 0.25) on HHWI scores.

## 520 Discussion

521 A suite of rigorous qualitative and quantitative methods has yielded a 20-item scale that  
522 is valid and reliable for the assessment of HHWI among postpartum women in Nyanza region  
523 (Table 7).

524 Our final scale is composed of items measuring different aspects of water insecurity, yet  
525 its latent structure reflects the central assumption of unidimensionality (Tables 5 & 6). This  
526 unidimensionality is consistent with the structure of household water insecurity scales developed  
527 in Ethiopia [2,40], Bolivia [36] and Uganda [3], but differs from the work in Texas [37] and  
528 Nepal [39] where the structure of HHWI is portrayed as multidimensional. Scale dimensionality  
529 was not assessed in any of these studies with the statistical rigor used here; we encourage future  
530 studies to draw from the methods outlined here for comparable assessment of dimensionality.

531 The HHWI scale performed well in terms of recall bias, with a correlation coefficient of  
532 0.76 between retrospective and prospective responses. As for reliability across time, this scale  
533 had a Cronbach's alpha of 0.97 at 15 and 18 months postpartum, which is well above the  
534 recommended threshold for assessing the internal consistency of scales [88,90,96] and higher  
535 than other coefficient alphas reported in HHWI scales elsewhere [2,39,40]. Further, the  
536 coefficient of stability ( $r=0.62$ ) attests to the strength of our scale over time. With the exception  
537 of Stevenson et al. [41] who report on a pre-post intervention study using repeated measures of  
538 household water insecurity, HHWI scales to date have not included repeated measures, which  
539 makes it impossible to compare our test-retest results to other existing HHWI scales [1].

540 Validity was supported in a number of ways. HHWI was positively associated with food  
541 insecurity and maternal stress, indicating predictive validity. This finding also affirms the fact  
542 that water insecurity is inextricably linked with food insecurity and has significant implications  
543 for sustainable development and poverty reduction [97,98]. The positive correlation between  
544 water insecurity and maternal stress also points to the psychosocial effects that water insecurity  
545 could have on households [4,20,99]. Future research will benefit from exploring the joint  
546 influences of food and water insecurity on health and well-being.

547 HHWI scores were positively associated with time spent collecting water and the amount  
548 of money spent on water, which suggests convergent validity. Water insecure households are  
549 more likely to spend more resources (time and money) obtaining water, which may lead to  
550 increased economic burden and a disproportionate burden on women who are primarily  
551 responsible for water collection [2,100]. The consequence of HHWI on women's economic  
552 burden should be quantified in future research.

553 We assessed discriminant validity by examining the relationship between HHWI scores  
554 and per capita household water usage. We expected that HHWI would be different from  
555 household water use, such that there would be no relationship, and indeed, we found no  
556 statistically significant relationship between the two factors. This was consistent with the  
557 findings of Hadley and Wutich [36], Stevenson et al. [2] and Tsai et al. [3] who also found no  
558 relationship between HHWI and household water use.

559 As a final test of validity, we evaluated the ability of our scale to differentiate between  
560 four 'known groups', i.e, groups we expected to have greater HHWI: respondents with *E. coli*-  
561 contaminated drinking water vs. those without; households interviewed in the dry season vs. in  
562 the rainy season; households in which the mother was HIV-infected vs. -uninfected; and  
563 households who used improved vs. unimproved sources of water. While none of the between-  
564 group differences were statistically significant, they were all in the expected direction. We  
565 anticipate that with larger samples, we might find significant associations in the expected  
566 direction, as Tsai et al. found in Uganda [3].

567 Lastly, it is clear that many of the experiences of HHWI were psychosocial in nature  
568 (Figure 1). The proportion of persons who endorsed severe expressions of HHWI is of real  
569 public health relevance; 23.8% slept thirsty and 19.2% had no water in the household whatsoever



570 at least once in four weeks (Table 4). Nearly half (46.3%) of respondents reported worrying  
571 about not having enough water and 38.3% reported feeling angry or frustrated about insufficient  
572 water in the last four weeks (Table 4). The frequency of these experiences suggests that the  
573 mitigation of HHWI in this region must be a priority for stakeholders and policy makers.

574 Although this study is amongst the most rigorous endeavors to develop a HHWI scale,  
575 there are a few limitations worth noting. First, the scale was developed in western Kenya; it is  
576 unlikely to be suitable for explorations of HHWI elsewhere without significant adaptation. The  
577 development of a cross-culturally validated HHWI scale is needed to assess and compare  
578 patterns of HHWI.

579 Second, the scale was developed among Kenyan women with young children; hence,  
580 some questions may not be applicable to households in which there are no children, e.g. Q5,  
581 Q12. Women were targeted as respondents because they are primarily responsible for water  
582 acquisition in this region [35]. We posit that this scale will be appropriate for measuring HHWI  
583 when men are primarily responsible for water acquisition and use. However, this needs to be  
584 empirically tested.

585 A further shortcoming is that twenty questions may be too many for some settings. The  
586 development of a more concise version of the scale, analogous to the Household Hunger Scale  
587 [101] might facilitate the implementation of this scale in diverse settings.

588 The study would have been strengthened if the sample used for the confirmatory factor  
589 analysis would have been from a different population entirely. Having the same participants at  
590 15 and 18 months postpartum from the same cohort may increase common method variance and  
591 contribute to the interrelationship we find between the two time points [102]. It will be

592 interesting to confirm the hypothetical model on a new sample both in Kenya and elsewhere to  
593 ascertain if they have the same meanings, latent factor, and factor loadings.

594 Lastly, our coefficient of stability, which was below the threshold of reliability (Table 8),  
595 could reflect measurement error or can be attributed to the changing conditions of participants as  
596 a result of differences in seasons or people's living situations.

597 These limitations notwithstanding, this scale will permit the creation of an indicator,  
598 household water insecurity, that can be used to answer a number of questions with clinical,  
599 programmatic, and policy implications. In much the same way that our ability to measure  
600 household-level food insecurity transformed our understanding of a range of clinical outcomes,  
601 including depression [99], obesity [103], and HIV acquisition and disease progression[104], we  
602 expect this scale to be useful for understanding how water insecurity impacts nutrition, disease,  
603 and psycho-social well-being. It can also shed light on the roles that water insecurity may play in  
604 food insecurity. Further, from a policy perspective, it can be used to identify and target resources  
605 to individuals and or areas where water insecurity is highest. Finally, it can be used to assess if  
606 technological, infrastructure, or policy interventions related to water security have measurable  
607 impact.

## 608 **Conclusions**

609 In sum, our 20-item HHWI scale (Table 7) is a reliable and well-validated measure of  
610 HHWI among women in Nyanza, Kenya. The implementation of this scale will make it possible  
611 to understand and quantify both the multi-factorial causes and consequences of HHWI (physical,  
612 mental, economic, social and nutritional). Also, the use of the scale will enable the monitoring of  
613 changes in HHWI over time and facilitate the provision of interventions to targeted households  
614 in need of support to increase household water security.

## 615 **Supporting Information**

- 616 **S1 Fig.** Integration of Delphi Method with Focus Group Discussions  
617
- 618 **S2 Fig.** Scree plot showing cut-off point for retained scale factors using exploratory factor  
619 analysis (Geomin Oblique Rotation)  
620
- 621 **S3 Fig.** Scree plot showing cut-off point for retained scale factors using parallel analysis  
622
- 623 **S1 Table** Delphi questions on household water insecurity
- 624 **S2 Table** Initial and final household water insecurity scale items for use among postpartum  
625 women in Kenya  
626
- 627 **S3 Table** Description of model fit indices and thresholds used in evaluating scale  
628 development results  
629

## 630 **Acknowledgements**

631 We are grateful to the dedicated mothers and babies of the Pith Moromo and Pii En Ngima Study  
632 cohort, whose participation has given us a new insight to household water insecurity. A thousand  
633 thanks to our study nurses: Joy China, Joyce Bonke, and Tobias Odwar; and also to our study  
634 trackers: Benter Ogwana, Teresa Owade, and Sarah Obaje. We also wish to thank Drs. Ruth  
635 Richardson and Yolanda Brooks of Cornell University for their work on evaluating the quality of  
636 water for the presence of *E.coli*. We are grateful to Dr. Mallory Johnson for his contribution to  
637 this study. We appreciate the immense support provided by the Atkinson Centre for Sustainable  
638 Future. The content of this paper is solely the responsibility of the authors.

## 639 **References**

- 640 1. Jepson W, Wutich A, Collins SM, Boateng GO, Young SL. Progress in household water  
641 insecurity metrics: a cross-disciplinary approach. *WIREs Water*. 2017;4:e1214.
- 642 2. Stevenson EGJ, Greene LE, Maes KC, Ambelu A, Tesfaye YA, Rheingans R, et al. Water  
643 insecurity in 3 dimensions: An anthropological perspective on water and women's  
644 psychosocial distress in Ethiopia. *Soc Sci Med*. 2012;75: 392–400.  
645 doi:10.1016/j.socscimed.2012.03.022
- 646 3. Tsai AC, Kakuhikire B, Mushavi R, Vořechovská D, Perkins JM, McDonough AQ, et al.  
647 Population-based study of intra-household gender differences in water insecurity: reliability  
648 and validity of a survey instrument for use in rural Uganda. *J Water Health*. 2016;14: 280–  
649 292. doi:10.2166/wh.2015.165

- 650 4. Wutich A, Ragsdale K. Water insecurity and emotional distress: Coping with supply,  
651 access, and seasonal variability of water in a Bolivian squatter settlement. *Soc Sci Med.*  
652 2008;67: 2116–2125. doi:10.1016/j.socscimed.2008.09.042
- 653 5. Webb P, Iskandarani M. *Water Insecurity and the Poor: Issues and Research Needs.* ZEF,  
654 Bonn, Germany: University of Bonn.
- 655 6. Bakker K. Water Security: Research Challenges and Opportunities. *Science.* 2012;337:  
656 914–915. doi:10.1126/science.1226337
- 657 7. Mekonnen MM, Hoekstra AY. Four billion people facing severe water scarcity. *Sci Adv.*  
658 2016;2: e1500323. doi:10.1126/sciadv.1500323
- 659 8. Hanjra MA, Qureshi ME. Global water crisis and future food security in an era of climate  
660 change. *Food Policy.* 2010;35: 365–377. doi:10.1016/j.foodpol.2010.05.006
- 661 9. Wheeler T, Braun J von. Climate Change Impacts on Global Food Security. *Science.*  
662 2013;341: 508–513. doi:10.1126/science.1239402
- 663 10. Young S. Invited commentary on Wutich, A. and Brewis, A. (2014) Food, water and  
664 scarcity: Toward a Broader Anthropology of Resource Insecurity. *Curr Anthropol.* 55: 461–  
665 462.
- 666 11. WHO/UNICEF Joint Water Supply & Sanitation Monitoring Programme. Progress on  
667 drinking water and sanitation: 2014 update. World Health Organization; 2014.
- 668 12. UN-DESA, UN-Water. Gender-Disaggregated Data on Water and Sanitation. United  
669 Nations Headquarters; 2009 Mar.
- 670 13. Wahaj R, Hartl M, Lubbock A, Cleveringa R, Nepveu A. Gender and water: Securing water  
671 for improved rural livelihoods: The multiple-uses system approach. International Fund for  
672 Agricultural Development.; 2007.
- 673 14. Reddy BS, Snehalatha M. Sanitation and Personal Hygiene: What Does It Mean to Poor  
674 and Vulnerable Women? *Indian J Gend Stud.* 2011;18: 381–404.  
675 doi:10.1177/097152151101800305.
- 676 15. Tandon N. Biopolitics, climate change and water security: impact, vulnerability and  
677 adaptation issues for women. *Agenda.* 2007;21: 4–17.  
678 doi:10.1080/10130950.2007.9676064.
- 679 16. Olufemi O, Ojo O. A Threat to Women’s Food Work and Livelihood. *Can Woman Stud*  
680 *Downsview.* 2013;30: 49–59.
- 681 17. UNHCR, UN HABITAT, WHO. The Right to Water [Internet]. 2010. Available:  
682 <http://www.ohchr.org/documents/publications/factsheet35en.pdf>

- 683 18. Ashton P, Ramasar V. Water and HIV/AIDS: Some strategic considerations in Southern  
684 Africa. In □: Turton AR, Henwood R, editors. *Hydropolitics in the Developing World: A*  
685 *Southern African Perspective*. African Water Issues Research Unit; 2005 pp. 217–235.
- 686 19. Krumdieck NR, Collins SM, Wekesa P, Mbullo P, Boateng GO, Onono M, et al. Household  
687 water insecurity is associated with a range of negative consequences among pregnant  
688 Kenyan women of mixed HIV status. *J Water Health*. 2016;14: 1028–1031.  
689 doi:10.2166/wh.2016.079
- 690 20. Workman CL, Ureksoy H. Water insecurity in a syndemic context: Understanding the  
691 psycho-emotional stress of water insecurity in Lesotho, Africa. *Soc Sci Med*. 2017;179: 52–  
692 60. doi:10.1016/j.socscimed.2017.02.026
- 693 21. Weiser SD, Young SL, Cohen CR, Kushel MB, Tsai AC, Tien PC, et al. Conceptual  
694 framework for understanding the bidirectional links between food insecurity and  
695 HIV/AIDS. *Am J Clin Nutr*. 2011;94: 1729S–1739S. doi:10.3945/ajcn.111.012070
- 696 22. Mermin J, Lule J, Ekwaru JP, Malamba S, Downing R, Ransom R, et al. Effect of co-  
697 trimoxazole prophylaxis on morbidity, mortality, CD4-cell count, and viral load in HIV  
698 infection in rural Uganda. *The Lancet*. 2004;364: 1428–1434. doi:10.1016/S0140-  
699 6736(04)17225-5
- 700 23. Brantley RK, Williams KR, Silva TMJ, Sstrom M, Thielman NM, Ward H, et al. AIDS-  
701 associated diarrhea and wasting in northeast Brazil is associated with subtherapeutic plasma  
702 levels of antiretroviral medications and with both bovine and human subtypes of  
703 *Cryptosporidium parvum*. *Braz J Infect Dis*. 2003;7: 16–22. doi:10.1590/S1413-  
704 86702003000100003
- 705 24. Isaac R, Alex RG, Knox TA. Malabsorption in wasting HIV disease: diagnostic and  
706 management issues in resource-poor settings. *Trop Doct*. 2008;38: 133–134.  
707 doi:10.1258/td.2008.080087
- 708 25. USAID, WHO. How to integrate water, sanitation and hygiene into HIV programmes  
709 [Internet]. 2010. Available:  
710 [http://whqlibdoc.who.int/publications/2010/9789241541548014\\_eng.pdf?ua=1](http://whqlibdoc.who.int/publications/2010/9789241541548014_eng.pdf?ua=1)
- 711 26. AngloAmerican Group Foundation, WaterAid, SAFAIDS. Integrated approach to HIV and  
712 Water, Sanitation and Hygiene in Southern Africa. A gap and needs assessment. 2014.
- 713 27. Ngwenya B, Kgathi D. HIV/AIDS and access to water: A case study of home-based care in  
714 Ngamiland, Bostwana. *Physics and Chemistry of the Earth, Parts A/B/C*. Elsevier. 31: 669–  
715 680.
- 716 28. Kenya National Bureau of Statistics (KNBS). *Kenya Demographic and Health Survey*  
717 2014. Rockville, Maryland, USA: ICF International; 2015 Dec.
- 718 29. Franken K. *Irrigation in Africa in figures: AQUASTAT survey*. Food & Agriculture  
719 Organization; 2005.

- 720 30. Loewenberg S. Breaking the cycle: drought and hunger in Kenya. *Lancet*. 383: 1025–1028.
- 721 31. Schmocker J, Liniger HP, Ngeru JN, Brugnara Y, Auchmann R, Brönnimann S. Trends in  
722 mean and extreme precipitation in the Mount Kenya region from observations and  
723 reanalyses. *Int J Climatol*. 2016;36: 1500–1514. doi:10.1002/joc.4438
- 724 32. Kisaka MO, Mucheru-Muna M, Ngetich F, Mugwe J, Mugendi D, Mairura F. Seasonal  
725 Rainfall Variability and Drought Characterization: Case of Eastern Arid Region, Kenya.  
726 *Adapting African Agriculture to Climate Change*. Springer, Cham; 2015. pp. 53–71.  
727 doi:10.1007/978-3-319-13000-2\_5
- 728 33. Mugo R., Ininda J., Okoola R. Inter Annual Variability of Onset and Cessation of the Long  
729 Rains in Kenya. *J Meteorol Relat Sci*. 2016;9: 30–47.
- 730 34. Kenya Meteorological Department. Monthly total rainfall observations from four volunteer  
731 rainfall stations (Macalder agricultural office, Rongo Chiefs Camp, Migori trees and fruit  
732 nursery and Migori water supply) and one meteorological station (Kisumu Meteorological  
733 Station) for varied years between 1982 and 2014). Nairobi, Kenya: Kenya Meteorological  
734 Department; 2016.
- 735 35. Collins S, Mbullo P, Miller JD, Boateng GO, Wekesa P, Onono M, et al. “I know how  
736 stressful it is to lack water!” Exploring the lived experiences of household water insecurity  
737 among pregnant and postpartum women in western Kenya. *Soc Sci Med*.
- 738 36. Hadley C, Wutich A. Experience-based Measures of Food and Water Security: Biocultural  
739 Approaches to Grounded Measures of Insecurity. *Hum Organ*. 2009;68: 451–460.  
740 doi:10.17730/humo.68.4.932w421317680w5x
- 741 37. Jepson W. Measuring ‘no-win’ waterscapes: Experience-based scales and classification  
742 approaches to assess household water security in colonias on the US–Mexico border.  
743 *Geoforum*. 2014;51: 107–120. doi:10.1016/j.geoforum.2013.10.002
- 744 38. Jepson W, Vandewalle E. Household Water Insecurity in the Global North: A Study of  
745 Rural and Periurban Settlements on the Texas–Mexico Border. *Prof Geogr*. 2016;68: 66–  
746 81. doi:10.1080/00330124.2015.1028324
- 747 39. Aihara Y, Shrestha S, Kazama F, Nishida K. Validation of household water insecurity scale  
748 in urban Nepal. *Water Policy*. 2015;17: 1019–1032. doi:10.2166/wp.2015.116
- 749 40. Hadley C, Freeman MC. Assessing reliability, change after intervention, and performance  
750 of a water insecurity scale in rural Ethiopia. *Food Secur*. 2016;8: 855–864.  
751 doi:10.1007/s12571-016-0599-1
- 752 41. Stevenson EGJ, Ambelu A, Caruso BA, Tesfaye Y, Freeman MC. Community Water  
753 Improvement, Household Water Insecurity, and Women’s Psychological Distress: An  
754 Intervention and Control Study in Ethiopia. *PLOS ONE*. 2016;11: e0153432.  
755 doi:10.1371/journal.pone.0153432



- 756 42. Kenya National Bureau of Statistics. Statistical abstract 2014 - Kenya National Bureau of  
757 Statistics [Internet]. 2014. Available:  
758 [http://www.knbs.or.ke/index.php?option=com\\_phocadownload&view=category&download](http://www.knbs.or.ke/index.php?option=com_phocadownload&view=category&download=609:statistical-abstract-2014&id=106:statistical-abstract&Itemid=1177)  
759 [=609:statistical-abstract-2014&id=106:statistical-abstract&Itemid=1177](http://www.knbs.or.ke/index.php?option=com_phocadownload&view=category&download=609:statistical-abstract-2014&id=106:statistical-abstract&Itemid=1177)
- 760 43. Jayne TS, Muyanga M. Land constraints in Kenya's densely populated rural areas:  
761 implications for food policy and institutional reform. *Food Secur.* 2012;4: 399–421.  
762 doi:10.1007/s12571-012-0174-3
- 763 44. Kenyan Analysis Report. Focus on □: Nyanza Province, Kissi/Gusii Tribe [Internet]. 2013.  
764 Available: [http://www.arrivekenya.org/wp-](http://www.arrivekenya.org/wp-content/uploads/2014/10/KenyaNyanzaKisiiBriefing.pdf)  
765 [content/uploads/2014/10/KenyaNyanzaKisiiBriefing.pdf](http://www.arrivekenya.org/wp-content/uploads/2014/10/KenyaNyanzaKisiiBriefing.pdf)
- 766 45. Ndege S, Washington S, Kaaria A, Prudhomme-O'Meara W, Were E, Nyambura M, et al.  
767 HIV Prevalence and Antenatal Care Attendance among Pregnant Women in a Large Home-  
768 Based HIV Counseling and Testing Program in Western Kenya. Correa-Velez I, editor.  
769 *PLOS ONE.* 2016;11: e0144618. doi:10.1371/journal.pone.0144618
- 770 46. Carpiano RM. Come take a walk with me: The “Go-Along” interview as a novel method for  
771 studying the implications of place for health and well-being. *Health Place.* 2009;15: 263–  
772 272. doi:10.1016/j.healthplace.2008.05.003
- 773 47. Garcia CM, Eisenberg ME, Frerich EA, Lechner KE, Lust K. Conducting Go-Along  
774 Interviews to Understand Context and Promote Health. *Qual Health Res.* 2012;22: 1395–  
775 1403. doi:10.1177/1049732312452936
- 776 48. Mabry J, Farris PE, Forro VA, Findholt NE, Purnell JQ, Davis MM. Environmental,  
777 Behavioral, and Cultural Factors That Influence Healthy Eating in Rural Women of  
778 Childbearing Age: Findings From a PhotoVoice Study. *Glob Qual Nurs Res.* 2016;3:  
779 2333393615622176. doi:10.1177/2333393615622176
- 780 49. Wang C. Using photovoice as a participatory assessment and issue selection tool.  
781 *Community Based Particip Res Health.* 2003; 179–196.
- 782 50. Linstone HA, Turoff M. The Delphi Method. *Tech Appl.* 2002;53. Available:  
783 <http://www.academia.edu/download/40866077/delphibook.pdf>
- 784 51. Natamba BK, Kilama H, Arbach A, Achan J, Griffiths JK, Young SL. Reliability and  
785 validity of an individually focused food insecurity access scale for assessing inadequate  
786 access to food among pregnant Ugandan women of mixed HIV status. *Public Health Nutr.*  
787 2015;18: 2895–905.
- 788 52. Jabine T, Straf M, Tanur J, Torangeau R. *Cognitive Aspects of Survey Methodology:*  
789 *Building a bridge between disciplines.* Washington, DC: National Academy Press; 1984.
- 790 53. Willis G. *Cognitive Interviewing* [Internet]. 2004. Available: [https://books-google-](https://books-google-com.turing.library.northwestern.edu/books/about/Cognitive_Interviewing.html?id=On1LBQAAQBAJ)  
791 [com.turing.library.northwestern.edu/books/about/Cognitive\\_Interviewing.html?id=On1LB](https://books-google-com.turing.library.northwestern.edu/books/about/Cognitive_Interviewing.html?id=On1LBQAAQBAJ)  
792 [QAAQBAJ](https://books-google-com.turing.library.northwestern.edu/books/about/Cognitive_Interviewing.html?id=On1LBQAAQBAJ)

- 793 54. Evans J, Jones P. The walking interview: Methodology, mobility and place. *Appl Geogr.*  
794 2011;31: 849–858. doi:10.1016/j.apgeog.2010.09.005
- 795 55. Coates J, Swindale A, Bilinsky P. Household Food Insecurity Access Scale (HFIAS) for  
796 measurement of food access: indicator guide (V.3). Washington, D.C.: FHI  
797 360/FANTA;2007.
- 798 56. Cohen S, Kamarck T, Mermelstein R. A Global Measure of Perceived Stress. *J Health Soc*  
799 *Behav.* 1983;24: 385–396. doi:10.2307/2136404
- 800 57. Brooks Y, Collins S, Mbullo P, Boateng G, Young SL, Richardson R. Evaluating human  
801 sensory perceptions and the Compartment Bag Test assays as proxies for the presence and  
802 concentration of *Escherichia coli* in drinking water in western Kenya: Suggestions for  
803 monitoring SDGs in low resource settings. *Am J Trop Med Hyg.* 2017;97:1005-1008.
- 804 58. Grady CA, Kipkorir EC, Nguyen K, Blatchley ER. Microbial quality of improved drinking  
805 water sources: evidence from western Kenya and southern Vietnam. *J Water Health.*  
806 2015;13: 607–612. doi:10.2166/wh.2014.206
- 807 59. Stauber C, Miller C, Cantrell B, Kroell K. Evaluation of the compartment bag test for the  
808 detection of *Escherichia coli* in water. *J Microbiol Methods.* 2014;99: 66–70.  
809 doi:10.1016/j.mimet.2014.02.008
- 810 60. Weiss P, Aw TG, Urquhart GR, Galeano MR, Rose JB. Well water quality in rural  
811 Nicaragua using a low-cost bacterial test and microbial source tracking. *J Water Health.*  
812 2016;14: 199–207. doi:10.2166/wh.2015.075
- 813 61. Muthén LK, Muthén BO. *Mplus User’s Guide*. Seventh Edition;1998-2015.
- 814 62. Tabachnick BG, Fidell L. *Using multivariate statistics*. Six edition. Boston, MC: Pearson  
815 Education Inc.; 2012.
- 816 63. DeVellis RF. *scale development: Theory and application*. Los Angeles, CA: Sage  
817 Publications; 2012.
- 818 64. Raykov T, Marcoulides GA. *Introduction to Psychometric Theory*. New York, NY:  
819 Routledge, Taylor & Francis Group; 2011.
- 820 65. Kaiser H. Little Jiffy, Mark Iv. *Educ Psychol Meas.* 1974;34: 111–117.
- 821 66. Bartlett MS. Tests of Significance in Factor Analysis. *Br J Stat Psychol.* 1950;3: 77–85.  
822 doi:10.1111/j.2044-8317.1950.tb00285.x
- 823 67. Dziuban CD, Shirkey EC. When is a correlation matrix appropriate for factor analysis?  
824 Some decision rules. *Psychol Bull.* 1974;81: 358–361. doi:10.1037/h0036316
- 825 68. Tobias S, Carlson JE. Brief Report: Bartlett’s Test of Sphericity and Chance Findings in  
826 Factor Analysis. *Multivar Behav Res.* 1969;4: 375–377. doi:10.1207/s15327906mbr0403\_8



- 827 69. Raykov T, Marcoulides GA. A First Course in Structural Equation Modeling. Second  
828 Edition. New Jersey: Lawrence Erlbaum Associates, Inc.; 2006.
- 829 70. Gerbing DW, Hamilton JG. Viability of exploratory factor analysis as a precursor to  
830 confirmatory factor analysis. *Struct Equ Model Multidiscip J.* 1996;3: 62–72.  
831 doi:10.1080/10705519609540030
- 832 71. Kaiser HF. The application of electronic computers to factor analysis. *Educ Psychol Meas.*  
833 1960;20: 141–151. doi:10.1177/001316446002000116
- 834 72. Cattell RB. The Scree test for the number of factors. *Multivar Behav Res.* 1966;1: 245-276.
- 835 73. Horn JL. A rationale and test for the number of factors in factor analysis. *Psychometrika.*  
836 1965;30: 179–185. doi:10.1007/BF02289447
- 837 74. Kline RB. Principles and Practice of Structural Equation Modeling. Fourth Edition. New  
838 York: The Guildford Press, 2015 Nov.
- 839 75. Cook KF, Kallen MA, Amtmann D. Having a fit: impact of number of items and  
840 distribution of data on traditional criteria for assessing IRT’s unidimensionality assumption.  
841 *Qual Life Res.* 2009;18: 447–460. doi:10.1007/s11136-009-9464-4
- 842 76. Hu L, Bentler PM. Cutoff criteria for fit indexes in covariance structure analysis:  
843 Conventional criteria versus new alternatives. *Struct Equ Model Multidiscip J.* 1999;6: 1–  
844 55. doi:10.1080/10705519909540118
- 845 77. Tucker LR, Lewis C. A reliability coefficient for maximum likelihood factor analysis.  
846 *Psychometrika.* 1973;38: 1–10. doi:10.1007/BF02291170
- 847 78. Bollen KA, Long SJ. Testing Structural Equation Models. Newbury Park, CA: Sage  
848 Publications; Newbury Park, CA: Sage publications; 1993.
- 849 79. Browne MW, Cudeck R. Alternative ways of assessing model fit. In K.A. Bollen & J.S.  
850 IONG (Eds.), *Testing Structural Equation Models* (PP. 136-162). Newbury Park, CA: Sage  
851 publications; 1993.
- 852 80. Byrne BM. Structural equation modeling with LISREL, PRELIS, and SIMPLIS: Basic  
853 concepts, applications and programming (Multivariate Applications Series). First Edition.  
854 Mahweh, New Jersey: Lawrence Erlbaum Associates, Inc.; 1998.
- 855 81. Jöreskog KG, Sörbom D. LISREL 8.54 [Internet]. 2004 [cited 5 Apr 2017]. Available:  
856 [https://scholar-google-](https://scholar-google-com.turing.library.northwestern.edu/scholar?q=KG+J%C3%B6reskog%2C+D+S%C3%B6rbom+AND+SRMR&btnG=&hl=en&as_sdt=0%2C14)  
857 [com.turing.library.northwestern.edu/scholar?q=KG+J%C3%B6reskog%2C+D+S%C3%B6](https://scholar-google-com.turing.library.northwestern.edu/scholar?q=KG+J%C3%B6reskog%2C+D+S%C3%B6rbom+AND+SRMR&btnG=&hl=en&as_sdt=0%2C14)  
858 [rbom+AND+SRMR&btnG=&hl=en&as\\_sdt=0%2C14](https://scholar-google-com.turing.library.northwestern.edu/scholar?q=KG+J%C3%B6reskog%2C+D+S%C3%B6rbom+AND+SRMR&btnG=&hl=en&as_sdt=0%2C14)
- 859 82. Brown MW. Confirmatory Factor Analysis for Applied Research. New York, NY:  
860 Guildford Press; 2014.

- 861 83. Bollen KA. Structural Equations with Latent Variables. New York, NY: John Wiley &  
862 Sons; 1989.
- 863 84. Reise SP, Moore TM, Haviland MG. Bifactor Models and Rotations: Exploring the Extent  
864 to Which Multidimensional Data Yield Univocal Scale Scores. *J Pers Assess.* 2010;92:  
865 544–559. doi:10.1080/00223891.2010.496477
- 866 85. Reise SP, Morizot J, Hays RD. The role of the bifactor model in resolving dimensionality  
867 issues in health outcomes measures. *Qual Life Res.* 2007;16: 19–31. doi:10.1007/s11136-  
868 007-9183-7
- 869 86. Brunner M, Nagy G, Wilhelm O. A Tutorial on Hierarchically Structured Constructs. *J*  
870 *Pers.* 2012;80: 796–846. doi:10.1111/j.1467-6494.2011.00749.x
- 871 87. Wassenberg-Severijnen, JE, Custers JW, Hox JJ, Vermeer A, Helders PJ. Reliability of the  
872 Dutch ‘Pediatric Evaluation of Disability Inventory’(PEDI). *Clinical rehabilitation.* 2003;4:  
873 457-462.
- 874 88. Cronbach LJ. Coefficient alpha and the internal structure of tests. *Psychometrika.* 1951;16:  
875 297–334. doi:10.1007/BF02310555
- 876 89. Raykov T. Evaluation of convergent and discriminant validity with multitrait–multimethod  
877 correlations. *Br J Math Stat Psychol.* 2011;64: 38–52. doi:10.1348/000711009X478616
- 878 90. Nunnally JC. *Psychometric Theory.* New York, NY: McGraw-Hill; 1978.
- 879 91. Churchill GA. A Paradigm for Developing Better Measures of Marketing Constructs. *J*  
880 *Mark Res.* 1979;16: 64–73. doi:10.2307/3150876
- 881 92. Guttman L. Some necessary conditions for common-factor analysis. *Psychometrika.*  
882 1954;19: 149–161. doi:10.1007/BF02289162
- 883 93. Gibbons RD, Hedeker DR. Full-information item bi-factor analysis. *Psychometrika.*  
884 1992;57: 423–436. doi:10.1007/BF02295430
- 885 94. Cohen S, Kamarck T, Mermelstein R. Perceived stress scale. *Meas Stress Guide Health Soc*  
886 *Sci.* 1994; Available: <http://mindgarden.com/documents/PerceivedStressScale.pdf>
- 887 95. Reise SP. The Rediscovery of Bifactor Measurement Models. *Multivar Behav Res.*  
888 2012;47: 667–696. doi:10.1080/00273171.2012.715555
- 889 96. Bernstein I, Nunnally JC. *Psychometric Theory.* New York, NY: McGraw-Hill; 1994.
- 890 97. Food and Agriculture Organization of the United Nations. 2050: Water supplies to dwindle  
891 in parts of the world, threatening food security and livelihoods. [Internet]. 2017. Available:  
892 <http://www.fao.org/news/story/en/item/283255/icode/>

- 893 98. Global Water Partnership. Global Water Security [Internet]. 2009. Available:  
894 [http://www.gwp.org/globalassets/global/activities/news/gwp\\_on\\_watersecurity\\_feb\\_2010.p](http://www.gwp.org/globalassets/global/activities/news/gwp_on_watersecurity_feb_2010.pdf)  
895 [df](http://www.gwp.org/globalassets/global/activities/news/gwp_on_watersecurity_feb_2010.pdf)
- 896 99. Hadley C, Patil CL. Food insecurity in rural Tanzania is associated with maternal anxiety  
897 and depression. *Am J Hum Biol.* 2006;18: 359–368. doi:10.1002/ajhb.20505
- 898 100. Zuin V, Ortolano L, Alvarinho M, Russel K, Thebo A, Muximpua O, et al. Water supply  
899 services for Africa’s urban poor: the role of resale. *J Water Health.* 2011;9: 773–784.  
900 doi:10.2166/wh.2011.031
- 901 101. Deitcheler M, Ballard T, Swindale A, Coates J. Validation of a Measure of Household  
902 Hunger for Cross-Cultural Use. Washington, DC: Food and Nutrition Technical Assistance  
903 II Project (FANTA-2), FHI 360; 2010.
- 904 102. Fiske DW. Convergent-discriminant validation in measurements and research strategies.  
905 *New Dir Methodol Soc Behav Sci.* 1982;12: 77–92.
- 906 103. Bronte-Tinkew J, Zaslow M, Capps R, Horowitz A, McNamara M. Food Insecurity Works  
907 through Depression, Parenting, and Infant Feeding to Influence Overweight and Health in  
908 Toddlers. *J Nutr.* 2007;137: 2160–2165.
- 909 104. Weiser SD, Young SL, Cohen CR, Kushel MB, Tsai AC, Tien PC, et al. Conceptual  
910 framework for understanding the bidirectional links between food insecurity and  
911 HIV/AIDS. *Am J Clin Nutr.* 2011;94: 1729S–1739S. doi:10.3945/ajcn.111.012070
- 912 105. Weiser SD, Young SL, Cohen CR, Kushel MB, Tsai AC, Tien PC, et al. Conceptual  
913 framework for understanding the bidirectional links between food insecurity and  
914 HIV/AIDS. *Am J Clin Nutr.* 2011;94: 1729S–1739S. doi:10.3945/ajcn.111.012070
- 915
- 916

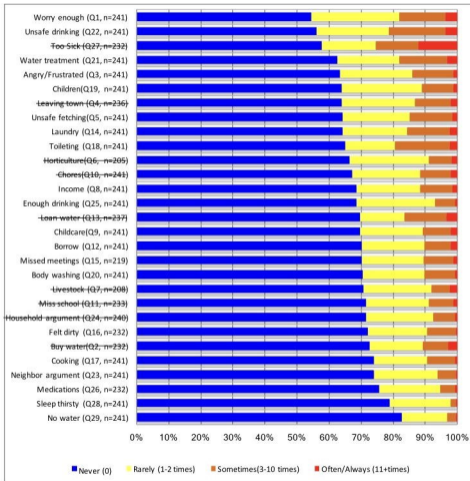

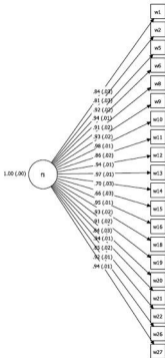

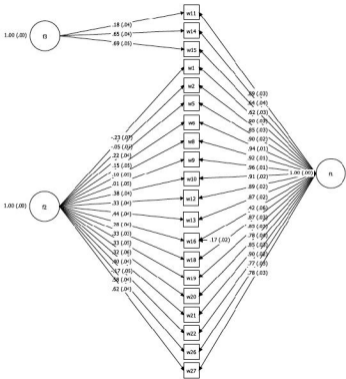

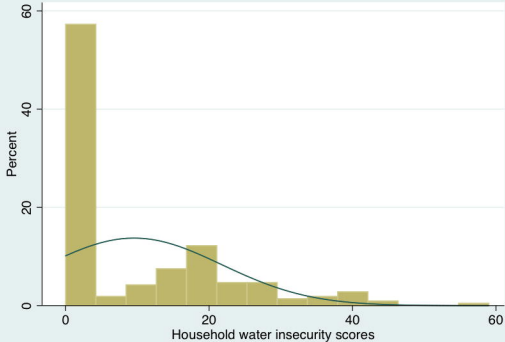

Mean (SD) = 9.5 (12.2)
